# Supplementary material for: COVID-19 Data Analysis Using Bayesian Models and Nonparametric Geostatistical Models
Source: MDPI journal article supplement (doi:10.3390/math11061359), 2023-03-10
Supplement: s1 [file s1]

Archive with 1 entries (1 files):
- mathematics-2178004-supplementary.pdf
