# Supplementary material for: COVID-19 Data Analysis Using Bayesian Models and Nonparametric Geostatistical Models
Source: MDPI journal article supplement (doi:10.3390/math11061359), 2023-03-10
Supplement: s1 [file s1 › mathematics-2178004-supplementary.pdf]

**Table S1.** Variables Representation in the Models

| Variables | Meaning                                                                                                                         |
|-----------|---------------------------------------------------------------------------------------------------------------------------------|
| $x_1$     | proportion of apartment in a building that has five or more storeys in the total occupied private dwellings for different areas |
| $x_2$     | proportion of other attached dwelling in the total occupied private dwellings                                                   |
| $x_3$     | proportion of apartment in a building that has fewer than five storeys                                                          |
| $x_4$     | average household size                                                                                                          |
| $x_5$     | prevalence of low income based on the Low-income measure (\%, after tax)                                                        |
| $x_6$     | prevalence of low income in 0-17 years age group(\%, after tax)                                                                 |
| $x_7$     | prevalence of low income in 18-64 years age group(\%, after tax)                                                                |
| $x_8$     | prevalence of low income in over 65 years age group(\%, after tax)                                                              |
| $x_9$     | proportion of self-employed workers in all class workers                                                                        |
| $x_{10}$  | population density                                                                                                              |
| $x_{11}$  | proportion of health occupations in all occupations                                                                             |
| $x_{12}$  | 65 years and over distribution (%) of the population by broad age groups                                                        |

**Table S2.** Restriction Methods and Corresponding Levels.

| Restriction Methods    | Restriction Levels                                                                                                                   |
|------------------------|--------------------------------------------------------------------------------------------------------------------------------------|
| Indoor Gathering       | level 0: No upper limit on the number of people allowed                                                                              |
|                        | level 1: The upper limit was less than 50                                                                                            |
|                        | level 2: The upper limit was less than 10                                                                                            |
|                        | level 3: The upper limit was less than 5                                                                                             |
| Outdoor Gathering      | level 0: No upper limit on the number of people allowed                                                                              |
|                        | level 1: The upper limit was less than 100                                                                                           |
|                        | level 2: The upper limit was less than 25                                                                                            |
|                        | level 3: The upper limit was less than 10                                                                                            |
| Non-essential Services | level 4: The upper limit was less than 5                                                                                             |
|                        | level 0: No restrictions were imposed                                                                                                |
|                        | level 1: Sit-down dining (with varying upper limit and some limitations, like wearing facial mask) at cafes, restaurants was allowed |
|                        | level 2: Access to some non-essential and leisure services allowed, such as outdoor and non-contact activities                       |
|                        | level 3: Restaurants/bars/cafes (except takeout/delivery) closed, retail services restricted and personal services closed            |
|                        | level 4: Non-essential businesses closed                                                                                             |

**Table S3.** Indoor Gathering Intervention Timeline Under Level in Ontario

| Date       | Levels                                                                                                                                                       |
|------------|--------------------------------------------------------------------------------------------------------------------------------------------------------------|
| 2020-03-28 | level 3                                                                                                                                                      |
| 2020-06-12 | level 2                                                                                                                                                      |
| 2020-07-17 | level 1 (24 public health units that entered stage 3)                                                                                                        |
| 2020-07-24 | level 1 (7 public health units that entered stage 3)                                                                                                         |
| 2020-07-31 | level 1 (Toronto, Peel public health units)                                                                                                                  |
| 2020-09-18 | level 2 (Toronto, Peel and Ottawa public health units)                                                                                                       |
| 2020-09-19 | level 2                                                                                                                                                      |
| 2020-11-07 | level 3 (Peel public health unit)                                                                                                                            |
| 2020-11-14 | level 3 (Toronto public health unit)                                                                                                                         |
| 2020-11-16 | level 3 (Hamilton, Halton, York public health units)                                                                                                         |
| 2020-11-23 | level 3 (Durham, Waterloo public health units)                                                                                                               |
| 2020-11-23 | level 2 (5 regions entered orange level and 6 regions entered yellow level)                                                                                  |
| 2020-11-28 | level 3 (Windsor Essex County health unit)                                                                                                                   |
| 2020-11-28 | level 2 (Haldimand Norfolk, and 3 regions entered yellow level)                                                                                              |
| 2020-12-07 | level 2 (Middlesex London, Thunder Bay health units and 3 regions entered yellow level)                                                                      |
| 2020-12-14 | level 3 (Windsor-Essex, York Region health units and 3 regions entered red level)                                                                            |
| 2020-12-14 | level 2 (Eastern, Leeds, Grenville and Lanark District health units)                                                                                         |
| 2020-12-21 | level 3 (Hamilton, Brant County, Niagara Region health units)                                                                                                |
| 2020-12-21 | level 2 (Kingston, Frontenac and Lennox and Addington health unit, Timiskaming and Sudbury Districts health units)                                           |
| 2020-12-26 | level 3                                                                                                                                                      |
| 2021-02-10 | level 2 (Kingston, Frontenac and Lennox and Addington health unit, Renfrew County and District health unit, Hastings and Prince Edward Counties health unit) |
| 2021-02-16 | level 2 (Leeds, Grenville and Lanark District health unit, Timiskaming health unit, 9 regions entered orange level, 4 regions entered yellow level)          |
| 2021-02-22 | level 3 (Lambton health unit)                                                                                                                                |
| 2021-03-01 | level 2 (Grey Bruce health unit, 2 regions entered yellow level, 3 regions entered orange level)                                                             |
| 2021-03-08 | level 3 (Peterborough, Sudbury health units)                                                                                                                 |
| 2021-03-08 | level 2 (Renfrew County health unit)                                                                                                                         |
| 2021-03-19 | level 3 (Ottawa health unit)                                                                                                                                 |
| 2021-03-22 | level 2 (North Bay Parry Sound District, Wellington Dufferin Guelph health units)                                                                            |
| 2021-03-22 | level 3 (Brant, Chatham-Kent, Leeds, Grenville and Lanark District health units)                                                                             |
| 2021-03-26 | level 3 (Timiskaming health unit)                                                                                                                            |
| 2021-03-30 | level 3 (Middlesex London health unit)                                                                                                                       |
| 2021-04-03 | level 3                                                                                                                                                      |

**Table S4.** Outdoor Gathering Intervention Timeline Under Level in Ontario

| Date       | Levels                                                                                                                                                                            |
|------------|-----------------------------------------------------------------------------------------------------------------------------------------------------------------------------------|
| 2020-03-28 | level 4                                                                                                                                                                           |
| 2020-06-12 | level 3                                                                                                                                                                           |
| 2020-07-17 | level 1 (24 public health units that entered stage 3)                                                                                                                             |
| 2020-07-24 | level 1 (7 public health units that entered stage 3)                                                                                                                              |
| 2020-07-31 | level 1 (Toronto, Peel public health units)                                                                                                                                       |
| 2020-09-18 | level 2 (Toronto, Peel and Ottawa public health units)                                                                                                                            |
| 2020-09-19 | level 2                                                                                                                                                                           |
| 2020-11-23 | level 3 (Toronto, Peel health units)                                                                                                                                              |
| 2020-12-14 | level 3 (Windsor Essex, York Region health units)                                                                                                                                 |
| 2021-01-13 | level 4                                                                                                                                                                           |
| 2021-02-10 | level 2 (Kingston, Frontenac and Lennox and Addington health unit, Renfrew County and District health unit, Hastings and Prince Edward Counties health unit)                      |
| 2021-02-16 | level 2 (Leeds, Grenville and Lanark District health unit, Timiskaming health unit, 9 regions entered orange level, 4 regions entered yellow level, 11 regions entered red level) |
| 2021-02-16 | level 3 (Niagara Region health unit)                                                                                                                                              |
| 2021-02-22 | level 2 (York Region health unit)                                                                                                                                                 |
| 2021-03-01 | level 3 (Simcoe Muskoka District, Thunder Bay District health units)                                                                                                              |
| 2021-03-01 | level 2 (Niagara Region health unit)                                                                                                                                              |
| 2021-03-08 | level 3 (Toronto, Peel health units)                                                                                                                                              |
| 2021-03-08 | level 2 (North Bay Parry Sound District, Sudbury and District health units)                                                                                                       |
| 2021-03-12 | level 3 (Sudbury and District health unit)                                                                                                                                        |
| 2021-04-03 | level 4                                                                                                                                                                           |
| 2021-05-20 | level 3                                                                                                                                                                           |

**Table S5.** Non-essential Services Intervention Timeline Under Level in Ontario

| Date       | Levels                                                                                                         |
|------------|----------------------------------------------------------------------------------------------------------------|
| 2020-03-25 | level 4                                                                                                        |
| 2020-05-19 | level 3                                                                                                        |
| 2020-06-12 | level 2 (24 public health unit regions entering stage 3)                                                       |
| 2020-06-19 | level 2 (7 public health unit regions entering stage 3)                                                        |
| 2020-06-24 | level 2 (Toronto, Peel public health units)                                                                    |
| 2020-07-17 | level 1 (24 public health units that have entered stage 3)                                                     |
| 2020-07-24 | level 1 (7 public health units that have entered stage 3)                                                      |
| 2020-07-31 | level 1 (Toronto, Peel public health units)                                                                    |
| 2020-10-10 | level 2 (Ottawa, Toronto, Peel public health units)                                                            |
| 2020-10-19 | level 2 (York region public health unit)                                                                       |
| 2020-11-23 | level 3 (Peel, Toronto public health units)                                                                    |
| 2020-12-14 | level 3 (Windsor Essex County, York Region public health units)                                                |
| 2020-12-21 | level 3 (Hamilton health unit)                                                                                 |
| 2020-12-26 | level 3                                                                                                        |
| 2021-02-10 | level 1 (3 regions that entered green-prevent level)                                                           |
| 2021-02-16 | level 1 (Leeds, Grenville and Lanark District health unit, Timiskaming health unit)                            |
| 2021-02-16 | level 1 (11 regions entered red-control level, 9 regions entered orange level, 4 regions entered yellow level) |
| 2021-02-22 | level 1 (York Region, Lambton health units)                                                                    |
| 2021-03-01 | level 1 (Niagara Region public health unit)                                                                    |
| 2021-03-08 | level 1 (North Bay Parry Sound District health unit)                                                           |
| 2021-03-19 | level 1 (Ottawa public health unit)                                                                            |
| 2021-04-03 | level 2                                                                                                        |
